# Supplementary material
Source: publisher figshare collection journal article supplement (https://acs.figshare.com/ndownloader/files/3749368)
Supplement: Supplementary file 1 [file 3749368]

# Energy and Emissions from US Population Shifts and Implications for Regional GHG Mitigation Planning - Supplementary Information

Rachel Hoesly<sup>\*1</sup>, H. Scott Matthews<sup>1,2</sup>, Chris Hendrickson<sup>1,2</sup>

<sup>1</sup>Carnegie Mellon University, Department of Civil and Environmental Engineering

<sup>2</sup>Carnegie Mellon University, Department of Engineering and Public Policy

## Table of Contents

|                                                                                                |            |
|------------------------------------------------------------------------------------------------|------------|
| <b>1 Emission Factors .....</b>                                                                | <b>S3</b>  |
| <b>2 Supplementary Results and Figures.....</b>                                                | <b>S4</b>  |
| <b>2.1 Residential Energy.....</b>                                                             | <b>S5</b>  |
| 2.1.1 Electricity vs Residential Fuels .....                                                   | S5         |
| 2.1.2 Region Radial Diagrams .....                                                             | S6         |
| 2.1.3 Residential Emissions Change Distributions by Origin State .....                         | S11        |
| 2.1.4 Size and Emissions of Select flows .....                                                 | S13        |
| <b>2.2 Transportation Emissions .....</b>                                                      | <b>S13</b> |
| 2.2.1 State Flows.....                                                                         | S13        |
| 2.2.2 Region Flows.....                                                                        | S14        |
| <b>2.3 Total Household Emissions .....</b>                                                     | <b>S16</b> |
| <b>3 Supplementary Discussion of Limitations and Uncertainty.....</b>                          | <b>S17</b> |
| <b>3.1 Electricity Emission Factors .....</b>                                                  | <b>S17</b> |
| 3.1.1 State versus Regional Emissions Factor Estimates.....                                    | S17        |
| 3.1.2 Average Emission Factors vs Marginal Emission Factors .....                              | S19        |
| <b>3.1 Household Characteristics, Types of Moves, and Sampling Migrating Households .....</b>  | <b>S19</b> |
| 3.1.1 Population Characteristics Migrants versus Non Migrants .....                            | S19        |
| <b>3.2 Sensitivity: Relating Residential Energy Use in Origin and Destination States .....</b> | <b>S24</b> |
| 3.2.1 Income and Total Energy (BTU) method.....                                                | S24        |
| 3.2.2 Correlation of origin and destination state energy use percentiles.....                  | S25        |
| <b>References:.....</b>                                                                        | <b>S27</b> |

## List of Figures

**Figure 1** State electricity emission factors estimated by EIA's Voluntary Reporting Green house Gasses Program..S3

**Figure 2** The distributions of expected changes in (a) all residential emissions and (b) electricity emissions for households moving to Florida. Emissions changes are driven by differences in electricity emissions, but dampened by the addition of emissions from other residential fuels..... S5

**Figure 3** Sum of expected residential emission changes for all households migrating to each state for a) residential emissions from all residential fuels (electricity, natural gas, fuel oil, kerosene, and propane) and b) only residential electricity emissions..... S6

**Figure 4** Radial migration diagram showing the sums of residential emissions changes for flows between US Census Regions that sum to net positive emissions, or emissions increases. Flows between regions representing emissions decreases are shown in Figure 5. The width of connecting lines represent the size of the emissions sum for all households in that flow and are colored by origin census region. .... S8

|                                                                                                                                                                                                                                                                                                                                                                                                                                                                                                                                                   |     |
|---------------------------------------------------------------------------------------------------------------------------------------------------------------------------------------------------------------------------------------------------------------------------------------------------------------------------------------------------------------------------------------------------------------------------------------------------------------------------------------------------------------------------------------------------|-----|
| <b>Figure 5</b> Radial migration diagram showing the sums of residential emissions changes for flows between US Census Regions that sum to net negative emissions, or emissions decreases. Flows between regions representing emissions increases are shown in Figure 4. The width of connecting lines represent the size of the emissions sum for all households in that flow and are colored by origin census region. ....                                                                                                                      | S9  |
| <b>Figure 6</b> The distributions of expected change in residential emissions for all households moving to Colorado. Each curve is the distribution for households moving from 49 other states and DC (origin state) to Colorado (destination state), colored by origin state Census region. ....                                                                                                                                                                                                                                                 | S11 |
| <b>Figure 7</b> Similar to Figure 6. Distributions of residential emission changes for select destination states. ....                                                                                                                                                                                                                                                                                                                                                                                                                            | S12 |
| <b>Figure 8</b> Distribution of the age of primary householder for migrating and non migrating populations in New Mexico (a) and New York (b) .....                                                                                                                                                                                                                                                                                                                                                                                               | S20 |
| <b>Figure 9</b> Distributions of expected household emission changes for households moving to Illinois by origin state using different correlation values to describe the relationship between a household's origin and destination state energy use percentile. The figures show correlation of generated random normal variables before transforming them to random uniform variables, which estimate percentile of energy use. The resulting correlation of a household's energy use in origin and destination state is shown in Table 9. .... | S26 |

## List of Tables

|                                                                                                                                                                                                                                                                                                                                        |     |
|----------------------------------------------------------------------------------------------------------------------------------------------------------------------------------------------------------------------------------------------------------------------------------------------------------------------------------------|-----|
| <b>Table 1</b> Average Electricity Emission Factors (lbs CO <sub>2</sub> eq/kWh) by state and region from EIA's Voluntary Reporting of Greenhouse Gases Program <sup>1</sup> .....                                                                                                                                                     | S3  |
| <b>Table 2</b> Life Cycle Natural Gas Emission Factors .....                                                                                                                                                                                                                                                                           | S4  |
| <b>Table 3</b> Other Residential Fuel Emission Factors from NREL Lifecycle Inventory Database <sup>4</sup> .....                                                                                                                                                                                                                       | S4  |
| <b>Table 4</b> Average VMT and Transportation Emissions per HH in 2005 and 2010, by state .....                                                                                                                                                                                                                                        | S13 |
| <b>Table 5</b> Net household transportation emission sums for flows between US Census Regions. Emission sums represent the sum of household emissions changes for all households in the state - state flows encompassed in a region flow. Migration flows are from origin census region (row) to destination census region (column)..  | S15 |
| <b>Table 6</b> Residential and Transportation Emission Changes for Migrating Household. The Sum of Emissions Changes, in tons CO <sub>2</sub> eq for all households moving to each state. Residential Energy results reflect Average of State and regional emissions factors and the BTU method of modeling Household energy use. .... | S16 |
| <b>Table 7</b> Summary Statistics for distributions of Household Emission change per year, by destination state, using state, regional, and average of state and regional Electricity Emission Factors, measured in tons CO <sub>2</sub> e. States that exhibit larger differences are highlighted. ....                               | S17 |
| <b>Table 8</b> Comparison of Results for BTU and Income method.....                                                                                                                                                                                                                                                                    | S24 |
| <b>Table 9</b> Correlation of Randomly Generated Variables and Energy use .....                                                                                                                                                                                                                                                        | S25 |

# 1 Emission Factors

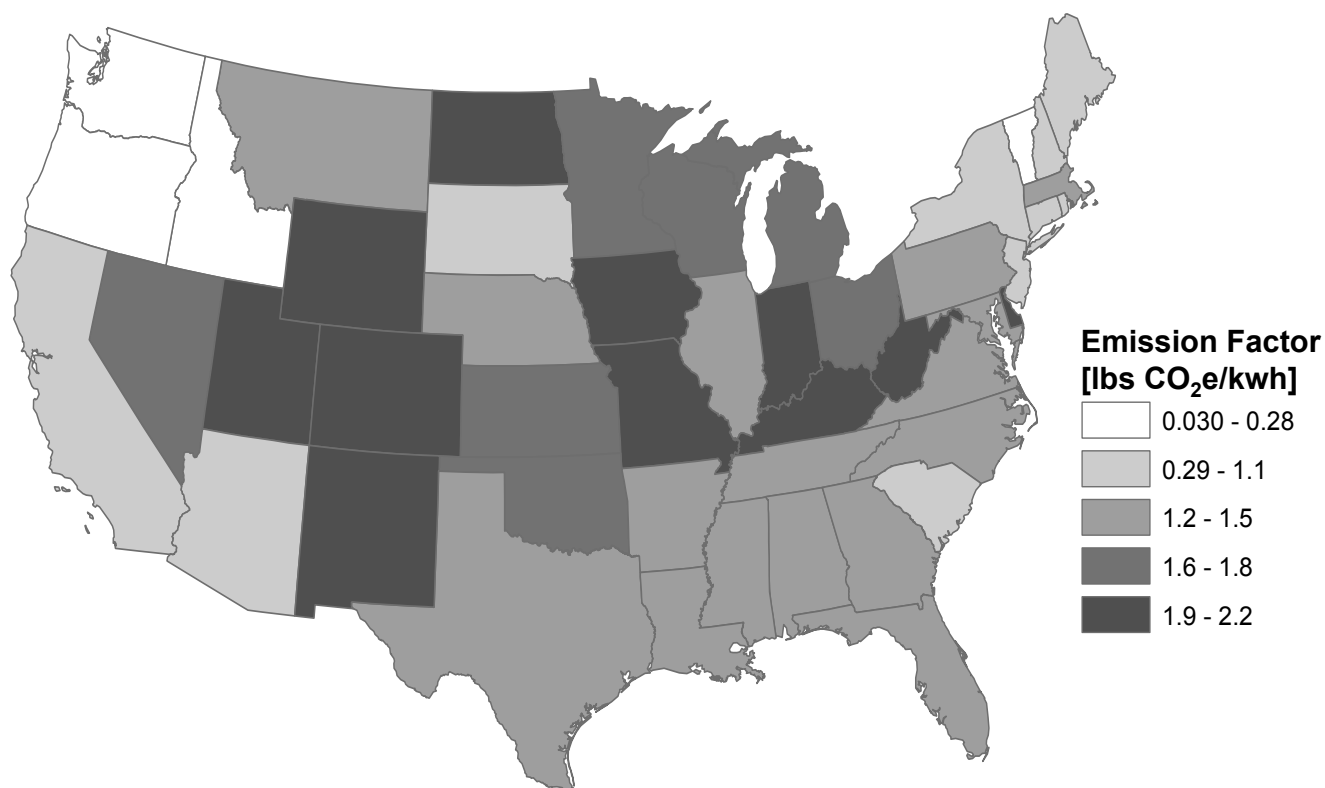

Figure 1 State electricity emission factors estimated by EIA’s Voluntary Reporting Green house Gasses Program<sup>1</sup>

Table 1 Average Electricity Emission Factors (lbs CO<sub>2</sub>eq/kWh) by state and region from EIA’s Voluntary Reporting of Greenhouse Gases Program<sup>1</sup>

| State                | Region                 | State Emission Factor | Region Average Emission Factor |
|----------------------|------------------------|-----------------------|--------------------------------|
| Alabama              | East-South Central     | 1.32                  | 1.50                           |
| Alaska               | Pacific Non-contiguous | 1.38                  | 1.56                           |
| Arizona              | Mountain               | 1.05                  | 1.57                           |
| Arkansas             | West-South Central     | 1.30                  | 1.43                           |
| California           | Pacific Contiguous     | 0.61                  | 0.45                           |
| Colorado             | Mountain               | 1.94                  | 1.57                           |
| Connecticut          | New England            | 0.94                  | 0.98                           |
| Delaware             | South Atlantic         | 1.84                  | 1.36                           |
| District of Columbia | South Atlantic         | 1.38                  | 1.36                           |
| Florida              | South Atlantic         | 1.40                  | 1.36                           |
| Georgia              | South Atlantic         | 1.38                  | 1.36                           |
| Hawaii               | Pacific Non-contiguous | 1.67                  | 1.56                           |
| Idaho                | Mountain               | 0.03                  | 1.57                           |
| Illinois             | East-North Central     | 1.17                  | 1.64                           |
| Indiana              | East-North Central     | 2.09                  | 1.64                           |
| Iowa                 | West-North Central     | 1.89                  | 1.74                           |
| Kansas               | West-North Central     | 1.69                  | 1.74                           |
| Kentucky             | East-South Central     | 2.02                  | 1.50                           |
| Louisiana            | West-South Central     | 1.18                  | 1.43                           |
| Maine                | New England            | 0.86                  | 0.98                           |
| Maryland             | South Atlantic         | 1.38                  | 1.36                           |

|                |                    |      |      |
|----------------|--------------------|------|------|
| Massachusetts  | New England        | 1.29 | 0.98 |
| Michigan       | East-North Central | 1.59 | 1.64 |
| Minnesota      | West-North Central | 1.53 | 1.74 |
| Mississippi    | East-South Central | 1.30 | 1.50 |
| Missouri       | West-North Central | 1.85 | 1.74 |
| Montana        | Mountain           | 1.44 | 1.57 |
| Nebraska       | West-North Central | 1.41 | 1.74 |
| Nevada         | Mountain           | 1.53 | 1.57 |
| New Hampshire  | New England        | 0.68 | 0.98 |
| New Jersey     | Mid Atlantic       | 0.71 | 1.04 |
| New Mexico     | Mountain           | 2.03 | 1.57 |
| New York       | Mid Atlantic       | 0.86 | 1.04 |
| North Carolina | South Atlantic     | 1.25 | 1.36 |
| North Dakota   | West-North Central | 2.25 | 1.74 |
| Ohio           | East-North Central | 1.81 | 1.64 |
| Oklahoma       | West-South Central | 1.73 | 1.43 |
| Oregon         | Pacific Contiguous | 0.28 | 0.45 |
| Pennsylvania   | Mid Atlantic       | 1.27 | 1.04 |
| Rhode Island   | New England        | 1.05 | 0.98 |
| South Carolina | South Atlantic     | 0.83 | 1.36 |
| South Dakota   | West-North Central | 0.80 | 1.74 |
| Tennessee      | East-South Central | 1.31 | 1.50 |
| Texas          | West-South Central | 1.46 | 1.43 |
| Utah           | Mountain           | 1.94 | 1.57 |
| Vermont        | New England        | 0.03 | 0.98 |
| Virginia       | South Atlantic     | 1.17 | 1.36 |
| Washington     | Pacific Contiguous | 0.25 | 0.45 |
| West Virginia  | South Atlantic     | 1.99 | 1.36 |
| Wisconsin      | East-North Central | 1.65 | 1.64 |
| Wyoming        | Mountain           | 2.16 | 1.57 |

**Table 2 Life Cycle Natural Gas Emission Factors**

| Source                                            | Emission Factor                                                                                                                                                         |
|---------------------------------------------------|-------------------------------------------------------------------------------------------------------------------------------------------------------------------------|
| Venkatesh et al <sup>2,3</sup>                    | $66 \text{ g CO}_2\text{eq/MJ} \times \frac{\text{lb CO}_2\text{eq}}{453.59\text{g}} \times \frac{1055.87\text{MJ}}{\text{MMBTU}} = 153 \text{ lb CO}_2\text{eq/MMBtu}$ |
| Advanced resources international <sup>2,4</sup>   | 145 lb CO <sub>2</sub> eq/MMBtu                                                                                                                                         |
| NREL US Lifecycle Inventory Database <sup>4</sup> | 148 lb CO <sub>2</sub> eq/MMBtu                                                                                                                                         |
| Average Emission Factor                           | 149 lb CO <sub>2</sub> eq/MMBtu                                                                                                                                         |

**Table 3 Other Residential Fuel Emission Factors from NREL Lifecycle Inventory Database<sup>4</sup>**

| Fuel          | Emission Factor              |
|---------------|------------------------------|
| Fuel Oil      | 192 CO <sub>2</sub> eq/MMBtu |
| Kerosene      | 190 CO <sub>2</sub> eq/MMBtu |
| Propane (LPG) | 155 CO <sub>2</sub> eq/MMBtu |

## 2 Supplementary Results and Figures

## 2.1 Residential Energy

### 2.1.1 Electricity vs Residential Fuels

Comparisons of distribution figures that reflect only electricity emissions versus those that reflect all residential fuels illustrate the same conclusion. In figures reflecting only electricity emissions for Florida, many of distribution curves are skewed and peak to the right of zero, because Florida has a carbon intense electricity grid, especially in comparison to Northeast states (shown in pink)- the origin of many migration households. However, the addition of natural gas and other residential fuels makes the curves narrower and centered about zero, illustrating that emissions from other fuels mute the emissions changes from electricity that households experience when moving across states.

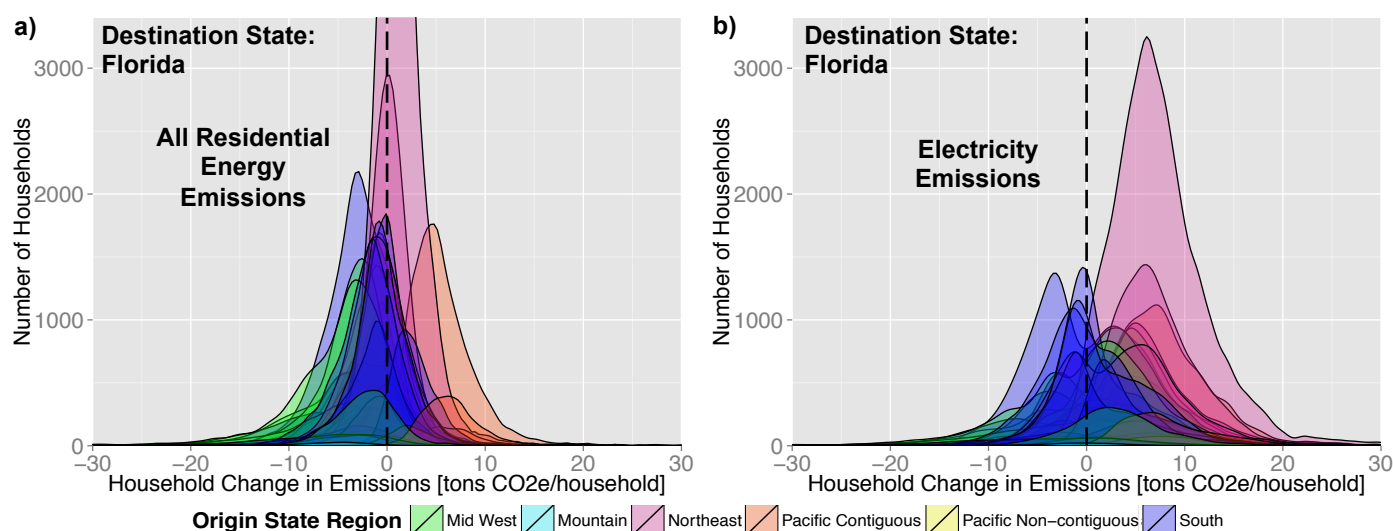

**Figure 2** The distributions of expected changes in (a) all residential emissions and (b) electricity emissions for households moving to Florida. Emissions changes are driven by differences in electricity emissions, but dampened by the addition of emissions from other residential fuels.

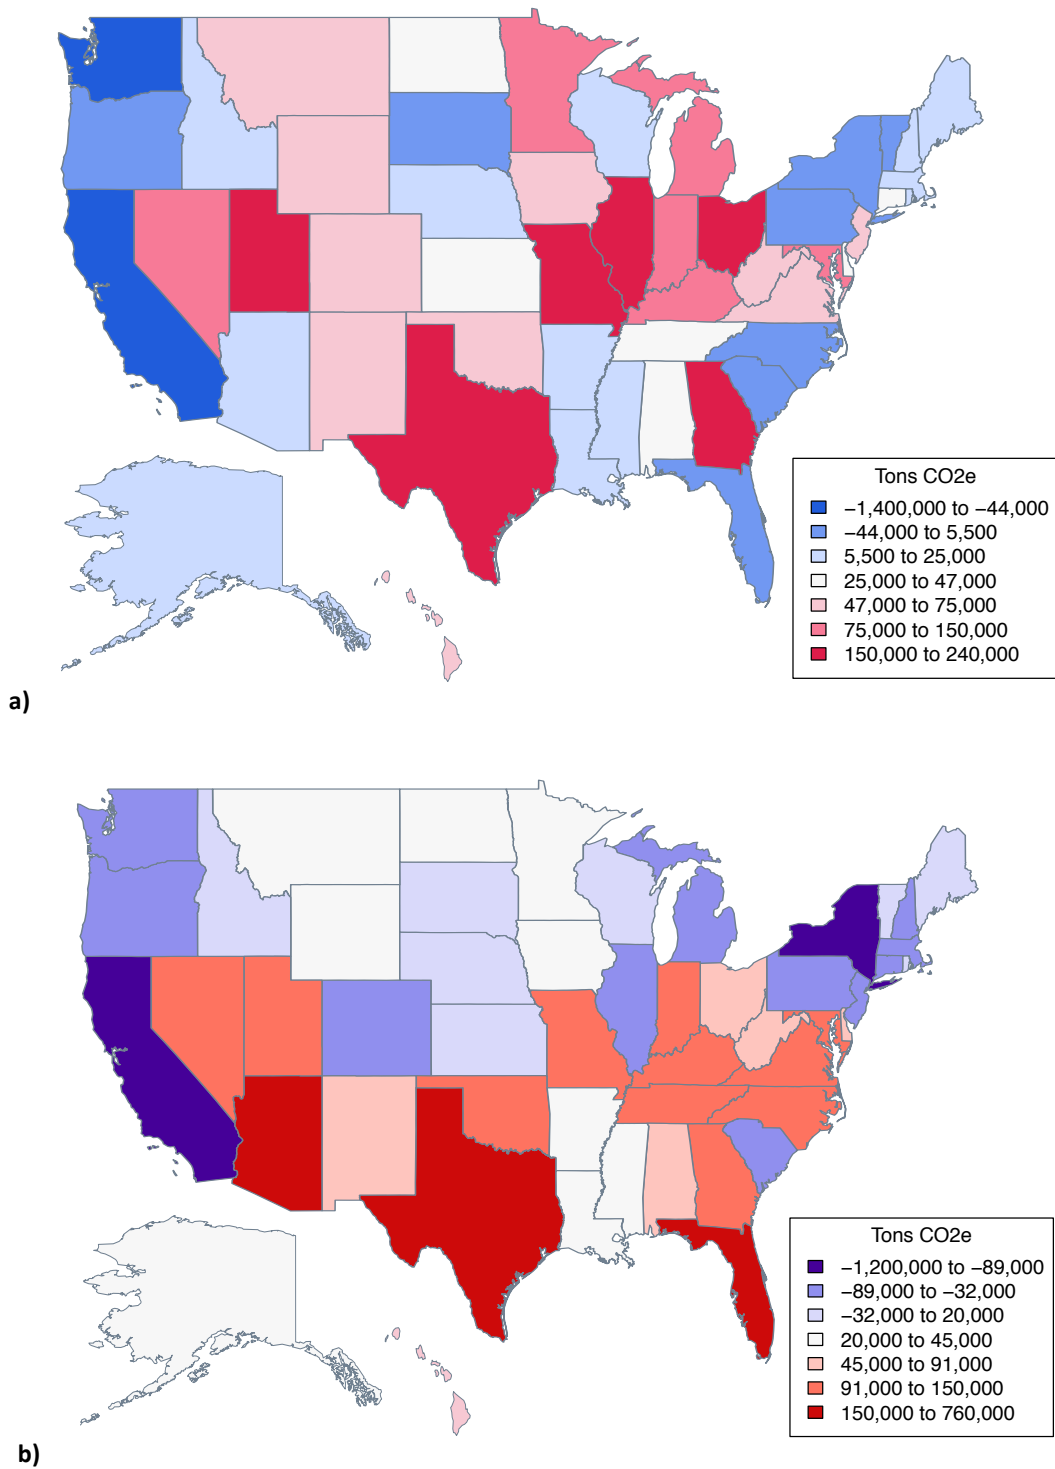

**Figure 3** Sum of expected residential emission changes for all households migrating to each state for a) residential emissions from all residential fuels (electricity, natural gas, fuel oil, kerosene, and propane) and b) only residential electricity emissions

### 2.1.2 Region Radial Diagrams

Figure 4 and Figure 5 show the emission changes for migration flows between US Census Regions. Figure 4 shows the flows that sum to net emissions increases and Figure 5 shows the flows that sum to net emissions decreases. US

census regions are organized around the outside of the circle. Lines connecting each region represent the sum of residential emissions for all households moving between those regions. The width of connecting lines represent the size of the emissions sum and are colored by origin Census Region.

Figure 4, which shows the US census region flows that sum to net emissions increases, is dominated by households moving from the Pacific region, which includes California and the Pacific Northwest, to every other US census region. The largest regional flow, shown in pink, represents households moving from the Pacific-contiguous region to the Mountain region. This flow mostly consists of households moving from California to Arizona and Nevada. Emissions flows from the Pacific region are mostly dominated by many households leaving California and experiencing moderate emissions increases. Figure 4 shows no flows terminating in the Pacific region, because all regional flows to the Pacific region sum to net emissions decreases.

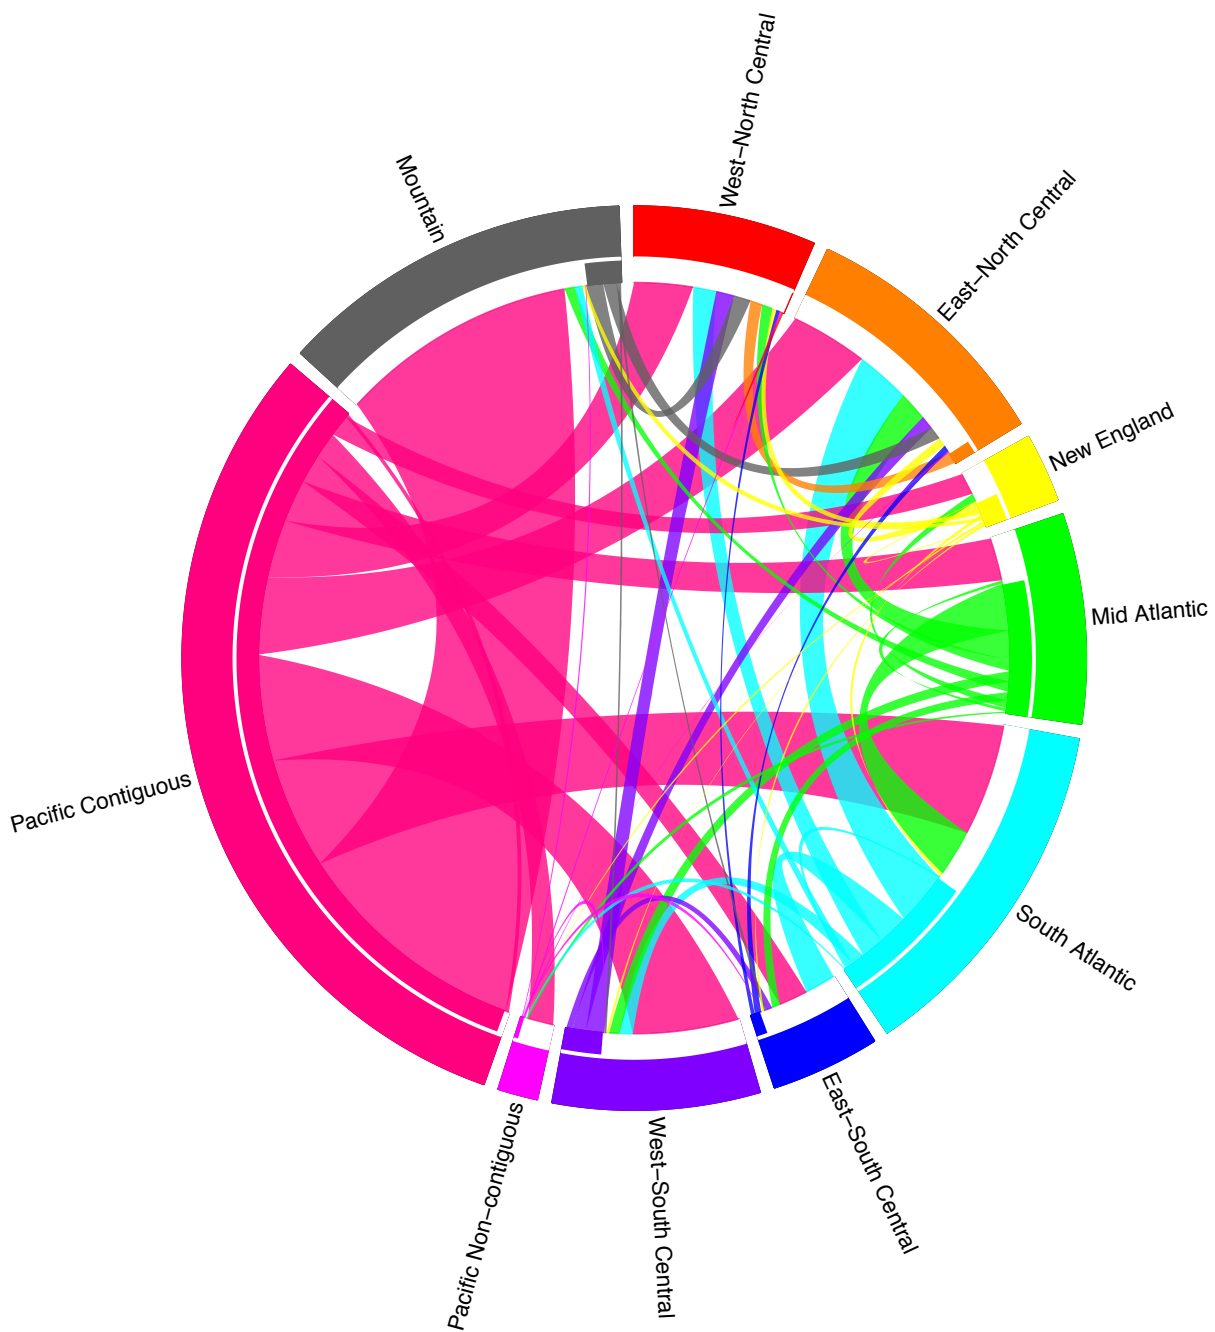

**Figure 4 Radial migration diagram showing the sums of residential emissions changes for flows between US Census Regions that sum to net positive emissions, or emissions increases. Flows between regions representing emissions decreases are shown in Figure 5. The width of connecting lines represent the size of the emissions sum for all households in that flow and are colored by origin census region.**



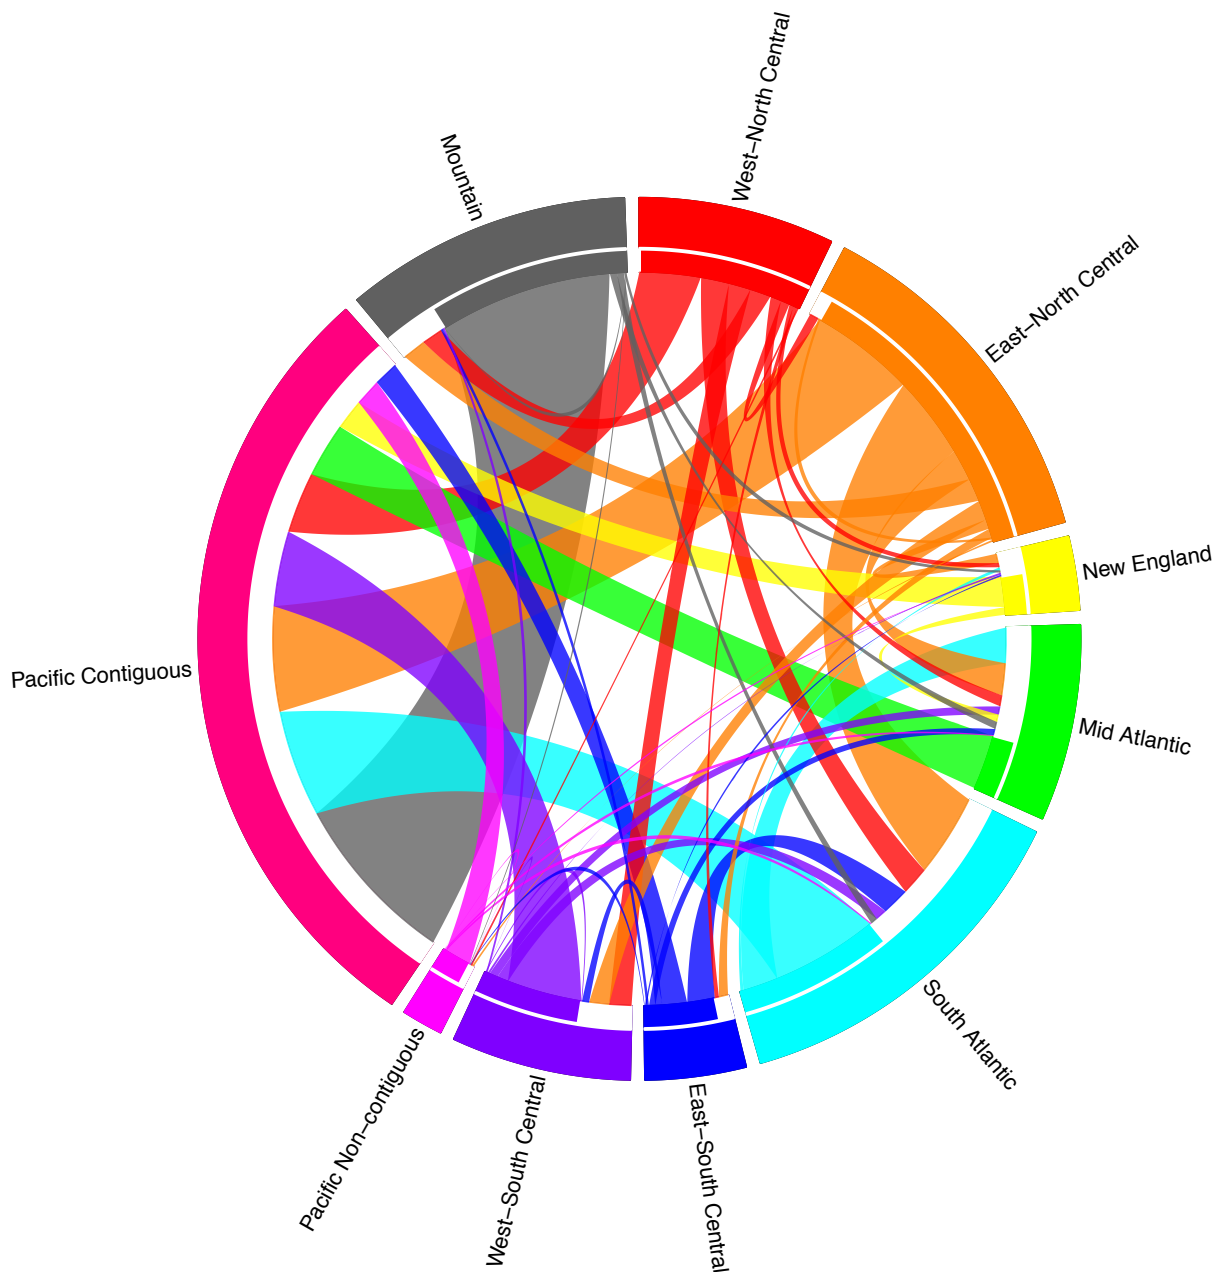

**Figure 5 Radial migration diagram showing the sums of residential emissions changes for flows between US Census Regions that sum to net negative emissions, or emissions decreases. Flows between regions representing emissions increases are shown in Figure 4. The width of connecting lines represent the size of the emissions sum for all households in that flow and are colored by origin census region.**

Figure 5, which shows region flows that sum to net emissions decreases, is dominated by households moving from other US census regions to the Pacific Region. Because total emissions changes in the US net close to zero, the sum

of emissions in Figure 4 and is roughly equal to the sum of emissions in Figure 5. Therefore, the width of the lines representing emissions flows in both figures is comparable.

### 2.1.3 Residential Emissions Change Distributions by Origin State

Similar to figure 2 in the main text, these figures shows the distributions of household emissions changes for all household moving to a destination state by origin states, colored by census region. Some figure cut off the tops of curves of very large migration flows. Figure shows the distributions of the changes in household emissions for all households moving to Arkansas by origin state. The 50 curves in the figure represent the 79,000 households moving to Colorado from the other 49 states and DC, colored by US Census Region. The figure shows the regional nature of migration flows and the similarity of state household emission profiles for geographically close states. Many curves peak at or close to zero. However, curves representing origin states in the mountain region, shown in turquoise, are shifted slightly left, indicating that households often emit less emissions when living in Colorado than in other mountain states, while curves representing origin states in the Pacific regions are shifted right - indicating that households often emit more emissions when living in Colorado than in Pacific states. The 5<sup>th</sup> and 95<sup>th</sup> percentile of emission changes for all households moving to Colorado is -7.4 and 11.8 tons CO<sub>2</sub>eq/household/year respectively, but the overall range is from -25 to +30 tons CO<sub>2</sub>eq/household/year.

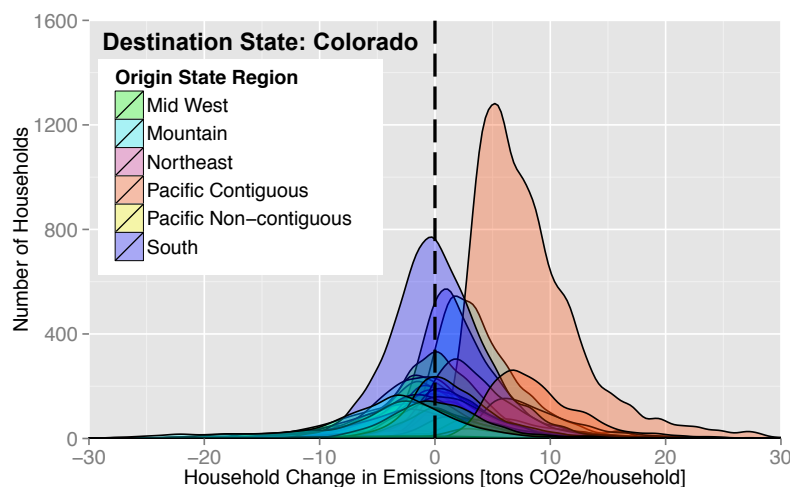

**Figure 6** The distributions of expected change in residential emissions for all households moving to Colorado. Each curve is the distribution for households moving from 49 other states and DC (origin state) to Colorado (destination state), colored by origin state Census region.

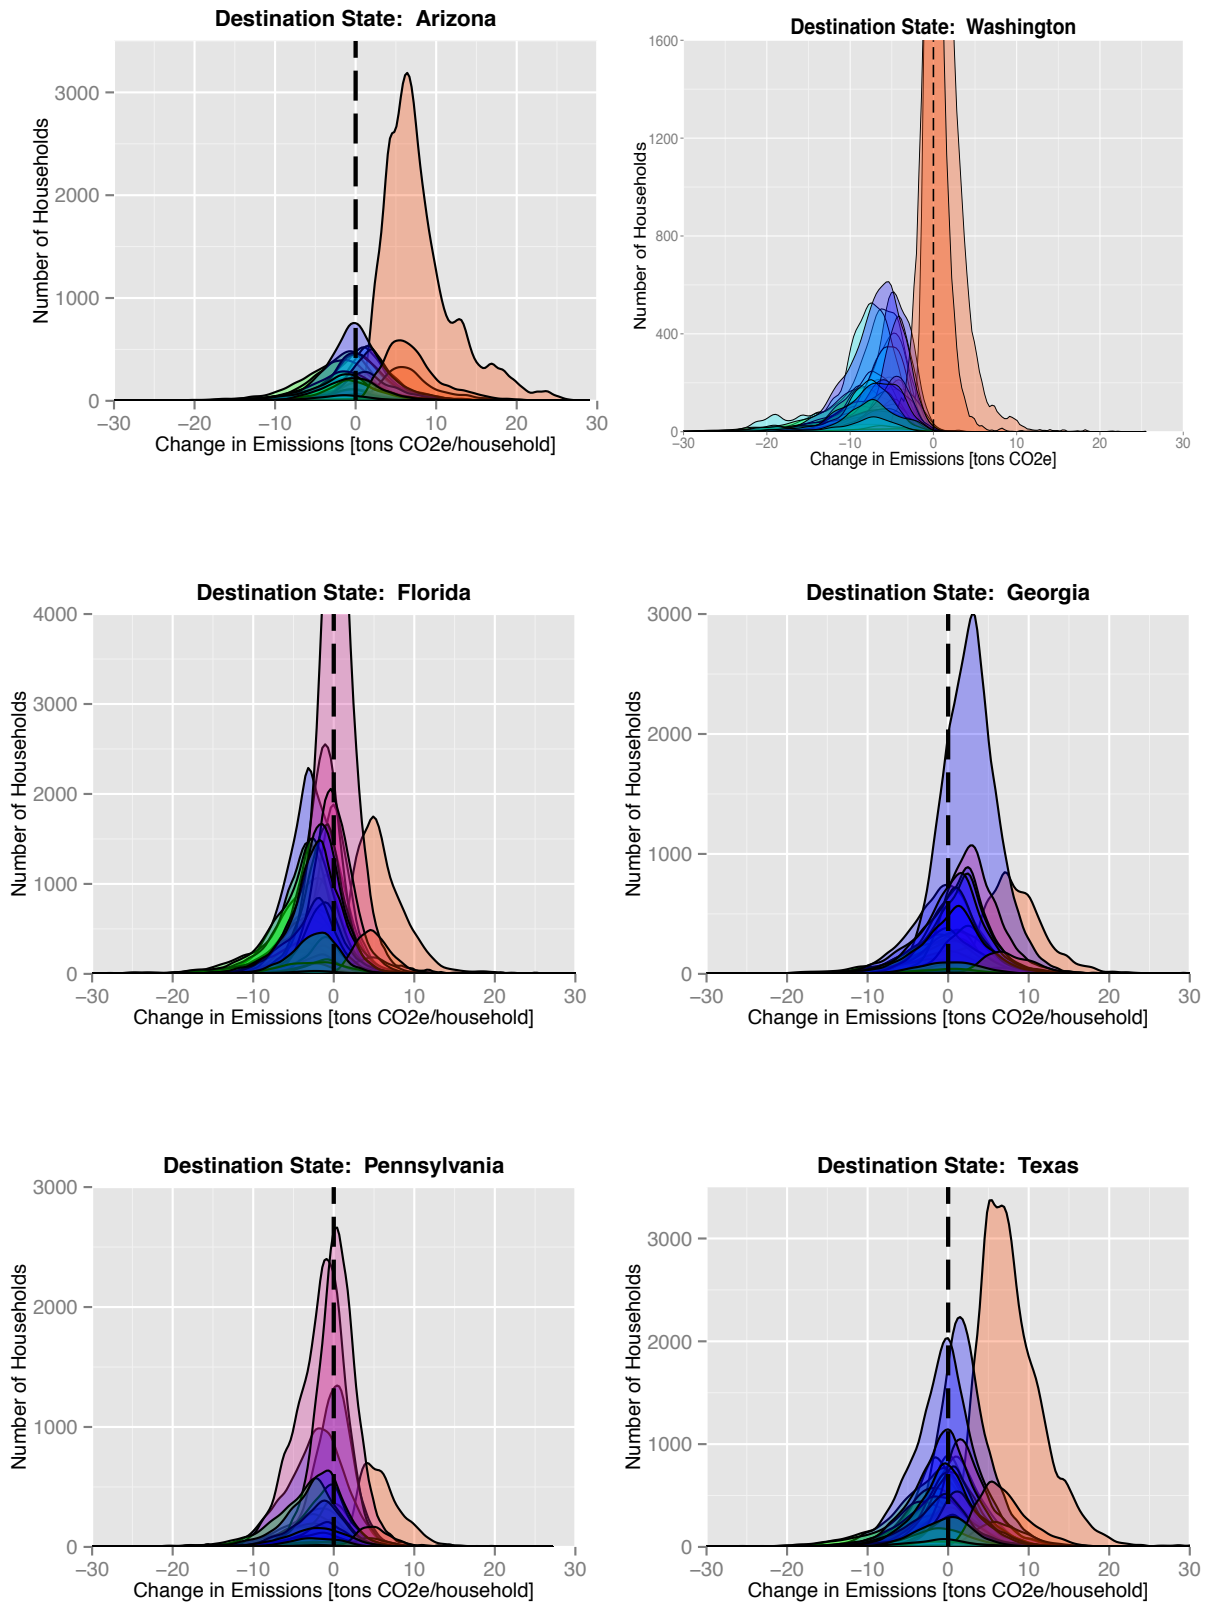

**Figure 7** Similar to Figure 6. Distributions of residential emission changes for select destination states.

### 2.1.4 Size and Emissions of Select flows

**Table 1 Net residential emission changes and size of migration flow for 6 largest flows and 6 largest emission sums**

| Flow     | Largest Flows             |                                           | Flow     | Largest Emission Sum                      |                           |
|----------|---------------------------|-------------------------------------------|----------|-------------------------------------------|---------------------------|
|          | Flow Size<br>[Households] | Emission Sum<br>[tons CO <sub>2</sub> eq] |          | Emission Sum<br>[tons CO <sub>2</sub> eq] | Flow Size<br>[Households] |
| NY to FL | 31,912                    | 18,400                                    | CA to TX | 224,300                                   | 28,250                    |
| CA to TX | 28,250                    | 224,300                                   | CA to AZ | 194,000                                   | 24,297                    |
| NY to NJ | 27,856                    | 60,300                                    | TX to CA | -136,600                                  | 17,304                    |
| CA to AZ | 24,297                    | 194,000                                   | AZ to CA | -113,200                                  | 14,090                    |
| FL to GA | 22,761                    | 57,900                                    | CA to CO | 78,500                                    | 10,786                    |
| CA to NV | 21,141                    | 158,200                                   | NY to CA | -75899                                    | 13,703                    |

## 2.2 Transportation Emissions

### 2.2.1 State Flows

**Table 4 Average VMT and Transportation Emissions per HH in 2005 and 2010, by state**

| State                | VMT per HH 2005 | VMT per HH 2010 | Transportation CO <sub>2</sub> eq 2005 [tons/hh] | Transportation CO <sub>2</sub> eq 2010 [tons/hh] | Change from 2005 to 2010 [tons/HH] |
|----------------------|-----------------|-----------------|--------------------------------------------------|--------------------------------------------------|------------------------------------|
| Alabama              | 33,350          | 35,350          | 17.49                                            | 17.58                                            | 0.1                                |
| Alaska               | 21,590          | 18,840          | 11.32                                            | 9.37                                             | -1.9                               |
| Arizona              | 27,130          | 25,730          | 14.23                                            | 12.80                                            | -1.4                               |
| Arkansas             | 29,400          | 30,050          | 15.42                                            | 14.95                                            | -0.5                               |
| California           | 27,220          | 26,020          | 14.27                                            | 12.94                                            | -1.3                               |
| Colorado             | 26,370          | 23,940          | 13.83                                            | 11.91                                            | -1.9                               |
| Connecticut          | 23,930          | 23,030          | 12.55                                            | 11.46                                            | -1.1                               |
| Delaware             | 29,930          | 27,220          | 15.70                                            | 13.54                                            | -2.2                               |
| District of Columbia | 14,960          | 14,230          | 7.84                                             | 7.08                                             | -0.8                               |
| Florida              | 28,590          | 27,830          | 14.99                                            | 13.84                                            | -1.2                               |
| Georgia              | 34,190          | 32,080          | 17.93                                            | 15.96                                            | -2.0                               |
| Hawaii               | 23,450          | 22,420          | 12.30                                            | 11.15                                            | -1.1                               |
| Idaho                | 27,940          | 27,400          | 14.65                                            | 13.63                                            | -1.0                               |
| Illinois             | 22,960          | 22,260          | 12.04                                            | 11.07                                            | -1.0                               |
| Indiana <sup>1</sup> | 29,390          | 30,660          | 15.41                                            | 15.25                                            | -0.2                               |
| Iowa                 | 25,870          | 25,660          | 13.56                                            | 12.76                                            | -0.8                               |
| Kansas               | 27,630          | 27,140          | 14.49                                            | 13.50                                            | -1.0                               |
| Kentucky             | 28,700          | 28,500          | 15.05                                            | 14.18                                            | -0.9                               |
| Louisiana            | 26,830          | 26,890          | 14.07                                            | 13.38                                            | -0.7                               |
| Maine                | 27,530          | 26,680          | 14.44                                            | 13.27                                            | -1.2                               |
| Maryland             | 27,000          | 26,380          | 14.16                                            | 13.12                                            | -1.0                               |
| Massachusetts        | 22,650          | 21,570          | 11.88                                            | 10.73                                            | -1.2                               |
| Michigan             | 26,760          | 25,630          | 14.03                                            | 12.75                                            | -1.3                               |

|                      |        |        |       |       |      |
|----------------------|--------|--------|-------|-------|------|
| Minnesota            | 28,170 | 27,080 | 14.77 | 13.47 | -1.3 |
| Mississippi          | 38,920 | 36,890 | 20.41 | 18.35 | -2.1 |
| Missouri             | 30,090 | 30,150 | 15.78 | 15.00 | -0.8 |
| Montana              | 30,210 | 27,780 | 15.84 | 13.82 | -2.0 |
| Nebraska             | 27,730 | 27,020 | 14.54 | 13.44 | -1.1 |
| Nevada               | 22,910 | 21,340 | 12.02 | 10.61 | -1.4 |
| New Hampshire        | 27,020 | 25,350 | 14.17 | 12.61 | -1.6 |
| New Jersey           | 23,490 | 23,020 | 12.32 | 11.45 | -0.9 |
| New Mexico           | 32,930 | 33,100 | 17.27 | 16.46 | -0.8 |
| New York             | 19,330 | 18,240 | 10.14 | 9.07  | -1.1 |
| North Carolina       | 29,700 | 27,890 | 15.57 | 13.87 | -1.7 |
| North Dakota         | 27,990 | 29,470 | 14.68 | 14.66 | 0.0  |
| Ohio                 | 24,510 | 24,710 | 12.85 | 12.29 | -0.6 |
| Oklahoma             | 34,060 | 33,320 | 17.86 | 16.57 | -1.3 |
| Oregon               | 24,750 | 22,410 | 12.98 | 11.15 | -1.8 |
| Pennsylvania         | 22,230 | 20,330 | 11.66 | 10.11 | -1.5 |
| Rhode Island         | 20,440 | 20,580 | 10.72 | 10.24 | -0.5 |
| South Carolina       | 30,220 | 27,890 | 15.85 | 13.87 | -2.0 |
| South Dakota         | 27,060 | 27,800 | 14.19 | 13.83 | -0.4 |
| Tennessee            | 29,930 | 28,860 | 15.69 | 14.36 | -1.3 |
| Texas                | 29,480 | 26,780 | 15.46 | 13.32 | -2.1 |
| Utah                 | 31,770 | 30,210 | 16.66 | 15.03 | -1.6 |
| Vermont              | 31,000 | 28,210 | 16.26 | 14.03 | -2.2 |
| Virginia             | 27,800 | 27,460 | 14.58 | 13.66 | -0.9 |
| Washington           | 22,640 | 21,940 | 11.87 | 10.91 | -1.0 |
| West Virginia        | 27,710 | 25,880 | 14.53 | 12.87 | -1.7 |
| Wisconsin            | 27,040 | 26,070 | 14.18 | 12.97 | -1.2 |
| Wyoming              | 44,200 | 42,940 | 23.18 | 21.36 | -1.8 |
| United States, total | 26,910 | 25,890 | 14.11 | 12.88 | -1.2 |

### 2.2.2 Region Flows

Table 5 shows the sum of emissions changes for migration flows between US census regions. These emission sums represent the sum of transportation emission changes for all households in state-to-state flows encompassed by a US census region. For example, household moving for California to Colorado and California to Arizona are both represented in the Pacific to Mountain region flow, while households moving from California to Georgia are represented in the Pacific to South Atlantic region flow. Households moving from state to state within the same region are represented in flows along the diagonal. For example, households moving from Arizona to Colorado are represented in the Mountain-Mountain region flow. Region flow emission sums vary from -354,000 tons CO<sub>2</sub>eq

(households moving from the South Atlantic to the Mid Atlantic) to 606,000 tons CO<sub>2</sub>eq for the opposite flow (households moving from the Mid Atlantic to the South Atlantic). Emissions increases are greatest for households moving to the South Atlantic, which includes high transportation emission states like Georgia and Florida; these emissions sum to more than 1,040,000 tons CO<sub>2</sub>eq. The largest emissions decreases come from households moving to the Mid Atlantic, which sum to -690,000 tons CO<sub>2</sub>eq. While residential emissions changes are dominated by households moving to and from the Pacific region, transportation emission changes are more balanced over census regions.

**Table 5 Net household transportation emission sums for flows between US Census Regions. Emission sums represent the sum of household emissions changes for all households in the state - state flows encompassed in a region flow. Migration flows are from origin census region (row) to destination census region (column).**

| Origin Census Region   | Destination Census Region |                    |             |              |                |                    |                    |                        |                    |          |
|------------------------|---------------------------|--------------------|-------------|--------------|----------------|--------------------|--------------------|------------------------|--------------------|----------|
|                        | West-North Central        | East-North Central | New England | Mid Atlantic | South Atlantic | East-South Central | West-South Central | Pacific Non-contiguous | Pacific Contiguous | Mountain |
| West-North Central     | 2,050                     | -55,000            | -7,180      | -29,200      | 11,800         | 12,900             | 27,600             | -6,350                 | -23,700            | 7,770    |
| East-North Central     | 63,300                    | 8,240              | -6,370      | -56,700      | 183,000        | 84,400             | 72,000             | -4,740                 | 14,900             | 38,900   |
| New England            | 7,060                     | 5,070              | 7,960       | -53,300      | 118,000        | 12,600             | 19,800             | -1,150                 | 19,400             | 15,300   |
| Mid Atlantic           | 29,200                    | 51,000             | 60,000      | 18,900       | 606,000        | 49,300             | 80,600             | 2,100                  | 88,700             | 61,700   |
| South Atlantic         | -11,100                   | -122,000           | -68,300     | -354,000     | 45,700         | 49,300             | -1,170             | -22,500                | -72,200            | -26,500  |
| East-South Central     | -12,600                   | -59,200            | -9,220      | -36,600      | -45,800        | -75                | -55,700            | -7,060                 | -28,200            | -17,000  |
| West-South Central     | -21,900                   | -47,700            | -14,100     | -60,700      | 6,910          | 55,400             | 8,460              | -13,500                | -59,500            | -21,800  |
| Pacific Non-contiguous | 5,840                     | 3,500              | 922         | -1,760       | 22,500         | 6,910              | 14,900             | 0                      | 16,300             | 17,200   |
| Pacific Contiguous     | 20,900                    | -13,000            | -14,300     | -73,500      | 75,200         | 31,500             | 77,900             | -17,000                | -21,800            | 52,000   |
| Mountain               | -6,780                    | -24,600            | -10,600     | -42,400      | 22,400         | 16,400             | 25,200             | -15,300                | -57,400            | 2,120    |

## 2.3 Total Household Emissions

**Table 6 Residential and Transportation Emission Changes for Migrating Household. The Sum of Emissions Changes, in tons CO<sub>2</sub>eq for all households moving to each state. Residential Energy results reflect Average of State and regional emissions factors and the BTU method of modeling Household energy use.**

|                         | Residential<br>Energy | Transportation | Total Household |                   | Residential<br>Energy | Transportation | Total<br>Household |
|-------------------------|-----------------------|----------------|-----------------|-------------------|-----------------------|----------------|--------------------|
| ALABAMA                 | 64,900                | 126,000        | 191,000         | MONTANA           | 51,400                | 16,500         | 67,900             |
| ALASKA                  | 22,700                | -48,600        | -25,900         | NEBRASKA          | 29,600                | 2,210          | 31,800             |
| ARIZONA                 | 212,000               | 1,840          | 214,000         | NEVADA            | 152,000               | -130,000       | 22,700             |
| ARKANSAS                | 16,300                | 20,900         | 37,200          | NEW HAMPSHIRE     | 14,900                | 16,400         | 31,300             |
| CALIFORNIA              | -1,550,000            | 107,000        | -1,450,000      | NEW JERSEY        | 110,000               | 5,420          | 115,000            |
| COLORADO                | 21,100                | -81,900        | -60,800         | NEW MEXICO        | 22,100                | 95,000         | 117,000            |
| CONNECTICUT             | 27,900                | -3,870         | 24,100          | NEW YORK          | -185,000              | -495,000       | -680,000           |
| DELAWARE                | 18,600                | 30,700         | 49,300          | NORTH<br>CAROLINA | -29,200               | 156,000        | 127,000            |
| DISTRICT OF<br>COLUMBIA | 23,800                | -146,000       | -123,000        | NORTH DAKOTA      | 19,700                | 6,330          | 26,100             |
| FLORIDA                 | -347,000              | 306,000        | -41,000         | OHIO              | 160,000               | -80,600        | 79,200             |
| GEORGIA                 | 172,000               | 378,000        | 550,000         | OKLAHOMA          | 34,100                | 123,000        | 157,000            |
| HAWAII                  | 57,100                | -39,500        | 17,600          | OREGON            | -188,000              | -56,400        | -244,000           |
| IDAHO                   | 114,000               | 16,900         | 131,000         | PENNSYLVANIA      | -126,000              | -193,000       | -320,000           |
| ILLINOIS                | 321,000               | -222,000       | 98,700          | RHODE ISLAND      | 10,800                | -22,700        | -11,900            |
| INDIANA                 | 76,100                | 107,000        | 183,000         | SOUTH<br>CAROLINA | -23,000               | 62,400         | 39,400             |
| IOWA                    | 65,100                | -12,200        | 52,900          | SOUTH DAKOTA      | 25,300                | -814           | 24,500             |
| KANSAS                  | 45,800                | -14,200        | 31,600          | TENNESSEE         | 91,700                | 40,200         | 132,000            |
| KENTUCKY                | 36,500                | 27,500         | 64,000          | TEXAS             | 203,000               | 93,200         | 296,000            |
| LOUISIANA               | 32,700                | -38,600        | -5,920          | UTAH              | 113,000               | 69,200         | 182,000            |
| MAINE                   | 7,330                 | 13,200         | 20,500          | VERMONT           | 6,150                 | 23,700         | 29,800             |
| MARYLAND                | 84,700                | 83,400         | 168,000         | VIRGINIA          | 124,000               | 103,000        | 227,000            |
| MASSACHUSETTS           | -39,000               | -87,000        | -126,000        | WASHINGTON        | -402,000              | -173,000       | -575,000           |
| MICHIGAN                | 104,000               | -12,100        | 91,600          | WEST VIRGINIA     | 8,150                 | 2,780          | 10,900             |
| MINNESOTA               | 113,000               | 23,400         | 136,000         | WISCONSIN         | -15,300               | 9,400          | -5,950             |
| MISSISSIPPI             | 30,300                | 145,000        | 175,000         | WYOMING           | 25,800                | 108,000        | 133,000            |
| MISSOURI                | 205,000               | 99,500         | 304,000         | UNITED STATES     | 165,000               | 561,000        | 725,000            |



### 3 Supplementary Discussion of Limitations and Uncertainty

#### 3.1 Electricity Emission Factors

##### 3.1.1 State versus Regional Emissions Factor Estimates

**Table 7 Summary Statistics for distributions of Household Emission change per year, by destination state, using state, regional, and average of state and regional Electricity Emission Factors, measured in tons CO<sub>2</sub>e. States that exhibit larger differences are highlighted.**

| State Name            | Median  |       |          | Mean    |       |          | 5%      |       |          | 95%     |       |          | Sum of Emissions Changes |            |            |
|-----------------------|---------|-------|----------|---------|-------|----------|---------|-------|----------|---------|-------|----------|--------------------------|------------|------------|
|                       | Average | State | Regional | Average                  | State      | Regional   |
| Alabama               | 0.9     | 0.6   | 1.5      | 0.8     | 0.3   | 1.4      | -6.9    | -7.4  | -6.6     | 8.3     | 7.7   | 9.4      | 37,100                   | 15,700     | 63,100     |
| Alaska                | 0.8     | 0.5   | 1.0      | 1.2     | 0.8   | 1.5      | -8.0    | -8.6  | -7.5     | 11.5    | 10.8  | 12.1     | 17,700                   | 11,500     | 22,500     |
| Arizona               | 0.1     | -1.4  | 1.8      | 0.2     | -1.6  | 2.1      | -8.7    | -10.6 | -7.0     | 8.9     | 6.2   | 12.2     | 22,600                   | -163,000   | 210,000    |
| Arkansas              | 0.1     | -0.2  | 0.4      | 0.1     | -0.4  | 0.5      | -8.6    | -9.3  | -7.9     | 8.8     | 8.2   | 9.7      | 2,760                    | -11,800    | 16,900     |
| California            | -6.2    | -5.7  | -6.7     | -6.9    | -6.3  | -7.4     | -15.3   | -15.0 | -15.9    | 0.3     | 1.1   | -0.4     | -1,450,000               | -1,340,000 | -1,560,000 |
| Colorado              | 0.7     | 1.5   | 0.0      | 1.1     | 1.8   | 0.3      | -7.5    | -7.4  | -8.0     | 10.5    | 11.8  | 9.2      | 85,100                   | 142,000    | 21,500     |
| Connecticut           | 0.8     | 0.9   | 0.8      | 0.9     | 0.9   | 0.8      | -5.1    | -5.3  | -5.2     | 6.8     | 7.0   | 7.0      | 29,300                   | 29,600     | 27,200     |
| Delaware              | 2.6     | 4.0   | 1.2      | 3.0     | 4.6   | 1.3      | -5.4    | -4.6  | -6.3     | 12.0    | 15.2  | 8.7      | 43,500                   | 67,300     | 18,500     |
| District of Columbia* | 1.1     | 1.3   | 0.8      | 1.2     | 1.4   | 1.0      | -7.0    | -7.0  | -7.0     | 9.7     | 9.6   | 9.4      | 30,500                   | 33,700     | 25,100     |
| Florida               | -1.1    | -0.8  | -1.4     | -1.2    | -0.9  | -1.4     | -8.4    | -8.5  | -8.4     | 5.3     | 5.7   | 5.1      | -286,000                 | -216,000   | -349,000   |
| Georgia               | 1.8     | 2.2   | 1.5      | 1.7     | 2.0   | 1.4      | -6.1    | -6.0  | -6.4     | 9.4     | 9.8   | 9.1      | 206,000                  | 243,000    | 172,000    |
| Hawaii                | 2.3     | 2.9   | 1.9      | 3.0     | 3.4   | 2.5      | -6.4    | -6.5  | -6.9     | 14.1    | 14.7  | 13.4     | 68,200                   | 77,600     | 56,300     |
| Idaho                 | 1.2     | -2.9  | 5.1      | 0.3     | -4.1  | 4.8      | -9.3    | -15.4 | -5.2     | 7.0     | 3.2   | 15.7     | 7,400                    | -98,800    | 116,000    |
| Illinois              | 1.3     | 0.3   | 2.2      | 1.9     | 0.6   | 3.3      | -7.2    | -8.7  | -5.9     | 12.6    | 10.5  | 15.1     | 187,000                  | 62,600     | 318,000    |
| Indiana               | 2.3     | 3.6   | 1.2      | 2.7     | 4.1   | 1.4      | -7.0    | -6.7  | -7.7     | 13.9    | 16.4  | 11.4     | 151,000                  | 226,000    | 77,200     |
| Iowa                  | 2.2     | 3.0   | 1.6      | 2.9     | 3.7   | 2.2      | -6.3    | -5.7  | -7.2     | 14.8    | 16.2  | 13.8     | 85,700                   | 109,000    | 64,800     |
| Kansas                | 1.1     | 0.9   | 1.2      | 1.0     | 0.8   | 1.2      | -8.9    | -9.7  | -8.4     | 10.8    | 10.7  | 11.0     | 36,600                   | 29,400     | 44,400     |
| Kentucky              | 2.9     | 4.8   | 1.1      | 2.8     | 4.7   | 0.9      | -6.8    | -6.1  | -7.8     | 12.5    | 15.8  | 9.2      | 119,000                  | 202,000    | 38,300     |
| Louisiana             | 0.0     | -0.6  | 0.7      | 0.0     | -0.8  | 0.8      | -7.5    | -8.5  | -7.1     | 7.8     | 6.6   | 9.3      | 324                      | -33,000    | 31,500     |
| Maine                 | 0.4     | 0.3   | 0.5      | 0.4     | 0.3   | 0.5      | -5.6    | -5.9  | -5.4     | 6.3     | 6.3   | 6.7      | 4,930                    | 3,840      | 6,920      |
| Maryland*             | 1.2     | 1.3   | 1.1      | 1.2     | 1.3   | 1.2      | -7.1    | -7.3  | -6.9     | 9.4     | 9.7   | 9.3      | 90,500                   | 98,300     | 86,100     |
| Massachusetts         | 0.0     | 0.7   | -0.6     | 0.1     | 0.8   | -0.6     | -6.2    | -5.9  | -6.9     | 6.9     | 7.9   | 6.0      | 6,960                    | 49,000     | -40,100    |
| Michigan              | 2.0     | 2.1   | 2.0      | 2.0     | 1.9   | 2.1      | -6.5    | -7.4  | -6.4     | 10.9    | 10.7  | 11.0     | 102,000                  | 95,300     | 107,000    |
| Minnesota             | 1.7     | 1.4   | 2.0      | 2.2     | 1.8   | 2.7      | -6.7    | -7.7  | -6.5     | 13.1    | 12.4  | 14.4     | 94,400                   | 74,000     | 114,000    |
| Mississippi           | 0.8     | 0.4   | 1.2      | 0.7     | 0.3   | 1.1      | -7.0    | -7.3  | -6.9     | 8.1     | 7.3   | 9.2      | 20,200                   | 7,430      | 32,900     |
| Missouri              | 3.4     | 3.9   | 3.0      | 3.9     | 4.5   | 3.4      | -5.5    | -5.2  | -6.0     | 15.2    | 16.1  | 14.4     | 237,000                  | 271,000    | 204,000    |
| Montana               | 3.0     | 3.3   | 3.0      | 3.2     | 3.1   | 3.3      | -6.7    | -7.8  | -6.7     | 13.5    | 13.4  | 13.9     | 50,300                   | 48,400     | 51,600     |
| Nebraska              | 0.8     | 0.2   | 1.5      | 0.7     | -0.2  | 1.6      | -8.7    | -10.0 | -7.7     | 10.0    | 8.6   | 11.3     | 13,500                   | -2,960     | 30,500     |
| Nevada                | 3.0     | 3.0   | 3.0      | 2.6     | 2.5   | 2.6      | -6.7    | -7.2  | -7.1     | 11.7    | 11.3  | 12.1     | 152,000                  | 144,000    | 151,000    |
| New Hampshire         | 0.2     | -0.4  | 0.7      | 0.1     | -0.5  | 0.7      | -5.4    | -6.2  | -4.8     | 5.4     | 5.1   | 6.3      | 2,170                    | -10,300    | 14,600     |

| State Name     | Median  |       |          | Mean    |       |          | 5%      |       |          | 95%     |       |            | Sum of Emissions Changes |               |                |
|----------------|---------|-------|----------|---------|-------|----------|---------|-------|----------|---------|-------|------------|--------------------------|---------------|----------------|
|                | Average | State | Regional   | Average                  | State         | Regional       |
| New Mexico     | 1.7     | 2.9   | 0.4      | 2.1     | 3.4   | 0.7      | -6.4    | -5.9  | -7.6     | 11.6    | 14.0  | 9.3        | 63,800                   | 101,000       | 21,400         |
| New York       | -1.3    | -1.4  | -1.2     | -1.5    | -1.7  | -1.3     | -8.1    | -8.5  | -8.0     | 5.0     | 4.7   | 5.4        | -213,000                 | -241,000      | -187,000       |
| North Carolina | -0.1    | -0.2  | 0.0      | -0.4    | -0.6  | -0.2     | -7.7    | -8.2  | -7.4     | 6.4     | 6.1   | 6.7        | -49,200                  | -73,400       | -26,600        |
| North Dakota   | 2.8     | 4.5   | 1.4      | 3.7     | 5.6   | 2.0      | -6.4    | -4.9  | -8.0     | 16.5    | 20.6  | 13.4       | 35,700                   | 53,500        | 18,900         |
| Ohio           | 2.2     | 2.7   | 1.9      | 2.5     | 2.9   | 2.2      | -6.7    | -7.6  | -6.3     | 12.7    | 13.8  | 11.9       | 184,000                  | 210,000       | 160,000        |
| Oklahoma       | 1.8     | 2.8   | 0.7      | 2.0     | 3.1   | 0.8      | -6.7    | -6.1  | -7.5     | 11.5    | 13.5  | 9.9        | 78,200                   | 123,000       | 32,500         |
| Oregon         | -2.8    | -2.7  | -2.6     | -3.9    | -4.2  | -3.6     | -12.7   | -13.6 | -12.5    | 2.0     | 1.8   | 2.5        | -201,000                 | -216,000      | -188,000       |
| Pennsylvania   | -0.3    | 0.5   | -1.0     | -0.6    | 0.2   | -1.3     | -7.8    | -7.8  | -8.1     | 6.0     | 7.1   | 4.9        | -54,700                  | 17,400        | -127,000       |
| Rhode Island   | 0.8     | 0.9   | 0.8      | 0.9     | 1.0   | 0.9      | -4.8    | -4.8  | -4.8     | 7.0     | 7.3   | 6.9        | 11,100                   | 12,300        | 10,300         |
| South Carolina | -1.7    | -3.2  | -0.1     | -2.1    | -3.9  | -0.4     | -9.0    | -11.1 | -7.4     | 3.7     | 1.6   | 6.2        | -135,000                 | -245,000      | -24,000        |
| South Dakota   | -0.3    | -2.2  | 1.6      | -0.2    | -2.7  | 2.3      | -9.5    | -12.4 | -7.7     | 8.9     | 5.6   | 14.0       | -2,380                   | -31,400       | 26,200         |
| Tennessee      | 0.5     | 0.1   | 1.0      | 0.5     | -0.2  | 1.2      | -7.4    | -8.8  | -6.7     | 8.7     | 7.7   | 9.8        | 39,900                   | -15,200       | 91,800         |
| Texas          | 1.0     | 1.3   | 0.7      | 1.2     | 1.4   | 0.9      | -7.2    | -7.4  | -7.4     | 10.0    | 10.3  | 9.9        | 244,000                  | 289,000       | 200,000        |
| Utah           | 4.7     | 6.2   | 3.2      | 5.2     | 6.7   | 3.7      | -4.4    | -3.9  | -5.9     | 16.9    | 20.2  | 14.3       | 160,000                  | 206,000       | 113,000        |
| Vermont        | -1.0    | -2.6  | 0.5      | -1.1    | -2.9  | 0.6      | -6.9    | -9.4  | -5.1     | 4.6     | 2.8   | 6.7        | -10,100                  | -26,500       | 5,760          |
| Virginia       | 0.5     | 0.0   | 1.0      | 0.4     | -0.2  | 1.1      | -7.3    | -8.2  | -6.5     | 8.3     | 7.4   | 9.4        | 50,500                   | -26,700       | 127,000        |
| Washington     | -4.8    | -4.7  | -4.6     | -5.0    | -5.3  | -4.7     | -13.6   | -14.6 | -13.4    | 1.4     | 1.1   | 2.0        | -429,000                 | -457,000      | -402,000       |
| West Virginia  | 2.5     | 4.5   | 0.5      | 2.7     | 4.9   | 0.5      | -6.6    | -5.8  | -7.8     | 12.6    | 17.1  | 8.5        | 49,700                   | 91,600        | 8,460          |
| Wisconsin      | 0.2     | 0.5   | -0.1     | 0.0     | 0.4   | -0.4     | -8.9    | -8.6  | -9.7     | 8.6     | 8.9   | 8.4        | 562                      | 16,300        | -15,400        |
| Wyoming        | 3.2     | 4.9   | 1.6      | 4.0     | 6.1   | 2.2      | -5.8    | -4.6  | -7.3     | 16.8    | 21.2  | 12.6       | 51,100                   | 76,900        | 27,300         |
|                |         |       |          |         |       |          |         |       |          |         |       | <b>Sum</b> | <b>98,400</b>            | <b>31,400</b> | <b>153,000</b> |

### *3.1.2 Average Emission Factors vs Marginal Emission Factors*

Marginal emission factors (MEFs) have been used to estimate emissions savings of avoided electricity use from demand side-interventions. Unlike average emission factors (AEFs), like those used in this report, that measure the CO<sub>2</sub> content of grid average electricity, MEFs measure the emission intensities of additional electricity generators needed to meet electricity demand (marginal generators) <sup>5,6</sup>. The difference between average MEFs and their corresponding AEFs vary from 2 - 35% over regions in the US <sup>5</sup>. MEFs are more appropriate than AEFs for estimating emissions implications of short term demand changes, such the implementation of an energy efficient lighting systems <sup>5,7</sup> or battery electricity vehicle charging <sup>7,8</sup> and have been shown to affect CO<sub>2</sub> emissions calculations as much as 50%<sup>6,8</sup>. Additional and avoided electricity use affects electricity systems at three different time scales: short term electricity grid balancing over seconds to an hour, short term system electricity trading from an hour to a year, and long term infrastructure planning years ahead <sup>5,6</sup>.

MEFs reflect short term systemic effects of electricity interventions <sup>5,6,9</sup>. Large amounts of net migration into regions will certainly effect long-term energy planning like the building and closing of power stations, which in turn will affect AEFs over time. However, these long-term effects are not reflected in MEFs, which in our opinion make AEFs more appropriate for this analysis.

## **3.1 Household Characteristics, Types of Moves, and Sampling Migrating Households**

### *3.1.1 Population Characteristics Migrants versus Non Migrants*

We conducted analysis that showed characteristic differences between populations of recently migrated households versus populations longer-term resident households in DESTINATION states. Energy data for this analysis is drawn from RECS data, which is representative of the US population, both migrating and not; however the characteristics of populations of migrating households in their destination states differ from non-migrating households in ways that likely have energy use implications. Analysis of ACS data shows that state populations of migrating households (households that identify in the survey that they have moved to that state from another state in the past 3 years) have fewer people, smaller family incomes, live in homes with fewer rooms, and have smaller self reported utility bills than non-migrating households.

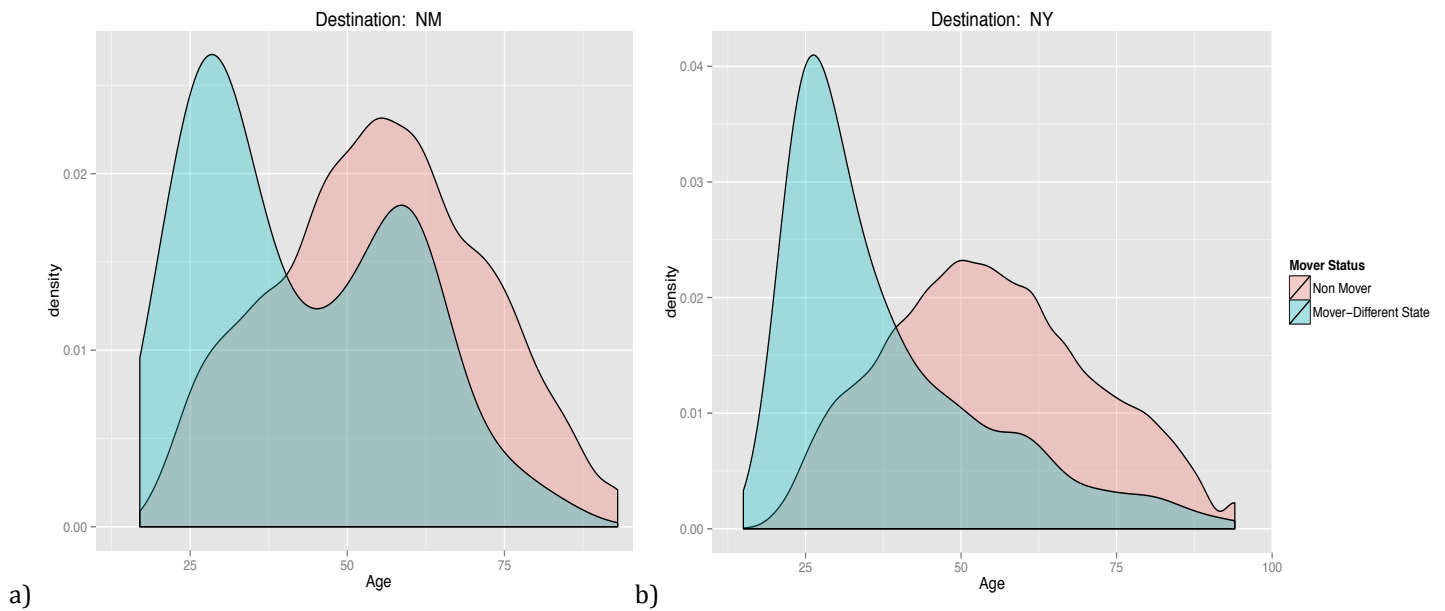

**Figure 8 Distribution of the age of primary householder for migrating and non migrating populations in New Mexico (a) and New York (b)**

Primary householders of migrating households are also on average 15 – 20 years younger than non-migrating households, based on the age of primary householder. However, the age distribution of migrating households in some states is bimodal, peaking at both early twenties and retirement age, while age distributions of non-migrating households are more normal, shown in Figure 8.

Individual regressions for each state were performed to predict a household's percentile of total energy use compared to other households in their states, using self-reported energy bill data. They show that accounting for age, income, and number of people in the household, migrating households use less energy than non-movers; a household can be expected to shift up to 10 percentiles lower, given that it recently moved to that new state. We concluded that a household is more likely to have smaller self reported energy use, smaller income, few rooms, and be younger if it has moved to a new state in the past year. The magnitude of differences in populations of migrating and non-migrating households vary widely across states. We were unable, however, to find data that can connect

or inform if those differences also apply in ORIGIN States. We cannot conclude that household that is likely to move in the next year is also smaller, younger ect.

### *3.1.2 Explanation and Discussion of Destination State Characteristic Differences*

Incorporating these destination state characteristic differences into our analysis is a part of a larger modeling task that involves 2 decisions and other considerations. First, how to select/draw/sample households from the general population and identify them as migrating households; and second, how to relate that household's origin and destination state energy uses. This is influence by 3 factors, explained below, that influence these 2 decisions in competing ways.

#### *3.1.2.1 General Characteristics of Migrating Households*

The section above explained some characteristic differences in populations of recent migrators and longer-term residents in destination states. However, these differences vary widely over states. Additionally, there are no data support these demographic differences for households in origin states, or connect how characteristics of a household will change over the course of a move (ie how income might change). This poses a number of pertinent questions. Do younger, smaller, lower income households move more often? Do the demographic differences we see in destination states also apply to Origin States. Do households with similar characteristics (different from a representative state or US population) move to a single state more often? ie: Do older households move to Florida or New Mexico?

On average over the US, migrating households are younger and smaller than non-migrating households. Applying this shift to only the energy distribution of households in their destination states (which is the only assumption that can be supported by data) without applying the same shift to households in their origin state will bias our results. It will likely make emissions savings larger and emissions increases smaller.

In many cases we believe that these characteristic differences do apply, ie: smaller, younger, lower income households move more often and will use less energy (compared to other households around them), wherever they are located. If this is the case, and we sample younger, smaller households from the US population as migrating households, then estimated emissions will be smaller in both origin and destination states, and the difference in low energy percentile household moves versus high energy percentile moves will be smaller (closer to zero). In this case, the magnitude of total emissions changes may be smaller, but the conclusions of this analysis will stay the same (emissions changes vary over regions and states but cancel to zero over the entire US). However, we know that this is likely not the case for certain origin-destination flows that see a high volume of retirement moves.

#### *3.1.2.2 Types of Moves*

Households move to different states for different reasons. The Census reports that reasons for moving vary widely over many reasons including family reasons (Marital Status change, establishing own household), job related (retirement, new job or transfer), housing related (change in owner/renter status, eviction), and other (natural disaster, climate change)<sup>10</sup>. Likelihood of these reasons for moving also varies widely over race, age, and gender.

We believe that specific types of moves have energy related consequences, which will influence the relationship between residential energy percentile of households in origin and destination states. This analysis assumes that the residential energy percentile of households is correlated in origin and destination state. If a household moves to a new state because of retirement, it is likely they will downsize to a smaller house and the households energy percentile will be lower than this model estimates. In this case, these households will experience more emissions savings than estimated (emissions increases will be smaller and emissions decreases will be larger). The opposite is true for households that move for reasons related to likely upsizing (new job, higher income).

There is no state specific data to infer the flow size of types of moves to different states, but we can make casual observations about flows such as New York to Florida, one of the larger migratory flows in the US, which is likely

dominated by retirement moves. The average household moving to retirement destination state, like Florida or New Mexico, may experience a larger emissions savings (or smaller emissions increase).

#### *3.1.2.3 Behavior or Migrated Households*

Studies have shown that households retain similar mobility behaviors to their origin locations after recently moving<sup>11</sup>. This may also be the case for residential energy usage. This phenomenon, may dampen the magnitude of emissions changes estimated in this study. While the total magnitude of changes may decrease because of this phenomenon, the qualitative results of this study will likely not change. The emissions sums of regions experiencing emissions increases will remain positive and sums of regions experiencing emissions decreases will remain negative.

#### *3.1.2.4 Model Implications*

These three categories of questions/problems bias our model in inconsistent and competing ways. While general trends can be supported by studies or data, adjusting the model for these issues at the state level would be largely unsupported by state specific data. Rather, these assumptions would be made by qualitative hunches. For example moves from NY to Florida is likely dominated by retirement moves, however we have found no comprehensive data to describe types of moves, or retirement flows. We cannot make assumptions about the reasons for moves for most OD flows. If we made the assumption that households are smaller, younger, and have lower income, our model estimates would be highly biased against high retirement flows. We believe that the balanced effects of accounting for characteristic qualities of movers versus non-movers and different types of moves will likely cancel out. Beyond random effects, our model accounts for neither upsizing nor downsizing moves. We believe that any accuracy gained from adding average or uninformed modeling complexities required to account for these issues would likely be clouded by the additional bias/uncertainty associated with those assumptions.

### 3.2 Sensitivity: Relating Residential Energy Use in Origin and Destination States

#### 3.2.1 Income and Total Energy (BTU) method

**Table 8 Comparison of Results for BTU and Income method**

|    | Income     | Btu        |    | Income   | Btu      |    | Income   | Btu      |
|----|------------|------------|----|----------|----------|----|----------|----------|
| AL | 33,700     | 64,900     | KY | 96,600   | 36,500   | ND | 28,200   | 19,700   |
| AK | 17,900     | 22,700     | LA | 5,710    | 32,700   | OH | 148,000  | 160,000  |
| AZ | 60,400     | 212,000    | ME | 4,680    | 7,330    | OK | 67,600   | 34,100   |
| AR | 4,070      | 16,300     | MD | 68,700   | 84,700   | OR | -139,000 | -188,000 |
| CA | -1,060,000 | -1,550,000 | MA | 2,350    | -39,000  | PA | -34,600  | -126,000 |
| CO | 83,400     | 21,100     | MI | 81,900   | 104,000  | RI | 8,210    | 10,800   |
| CT | 20,500     | 27,900     | MN | 71,100   | 113,000  | SC | -108,000 | -23,000  |
| DE | 29,300     | 18,600     | MS | 19,500   | 30,300   | SD | -1,070   | 25,300   |
| DC | 22,800     | 23,800     | MO | 187,000  | 205,000  | TN | 37,300   | 91,700   |
| FL | -222,000   | -347,000   | MT | 47,000   | 51,400   | TX | 234,000  | 203,000  |
| GA | 178,000    | 172,000    | NE | 10,400   | 29,600   | UT | 130,000  | 113,000  |
| HI | 65,300     | 57,100     | NV | 153,000  | 152,000  | VT | -9,970   | 6,150    |
| ID | 29,500     | 114,000    | NH | -1,770   | 14,900   | VA | 36,600   | 124,000  |
| IL | 137,000    | 321,000    | NJ | 43,600   | 110,000  | WA | -307,000 | -402,000 |
| IN | 117,000    | 76,100     | NM | 51,900   | 22,100   | WV | 34,700   | 8,150    |
| IA | 63,900     | 65,100     | NY | -151,000 | -185,000 | WI | 71       | -15,300  |
| KS | 22,600     | 45,800     | NC | -35,500  | -29,200  | WY | 38,200   | 25,800   |
|    |            |            |    |          |          | US | 422,000  | 169,000  |



### 3.2.2 Correlation of origin and destination state energy use percentiles

A major assumption of this model is the energy use of a household compared to other households in its origin state is related to the energy use of a household compared to other households in its destination state. Energy use of a migration household was modeled by generating a pair correlated uniform variables between 0 and 1 to represent a household's percentile of energy use in its origin and destination state. Conversion of randomly generated correlated normal variables to uniform variables then finally the total energy use of a household based on RECS data is not a linear process, so the correlation of paired household energy use is much smaller than the correlation of the original randomly generated pair of normal variables, shown in Table 9.

**Table 9 Correlation of Randomly Generated Variables and Energy use**

|                                                   |      |      |        |   |
|---------------------------------------------------|------|------|--------|---|
| Correlation of randomly generated normal variable | 1    | 0.95 | .5     | 0 |
| Correlation of total energy use                   | 0.88 | .83  | 0.0012 | 0 |

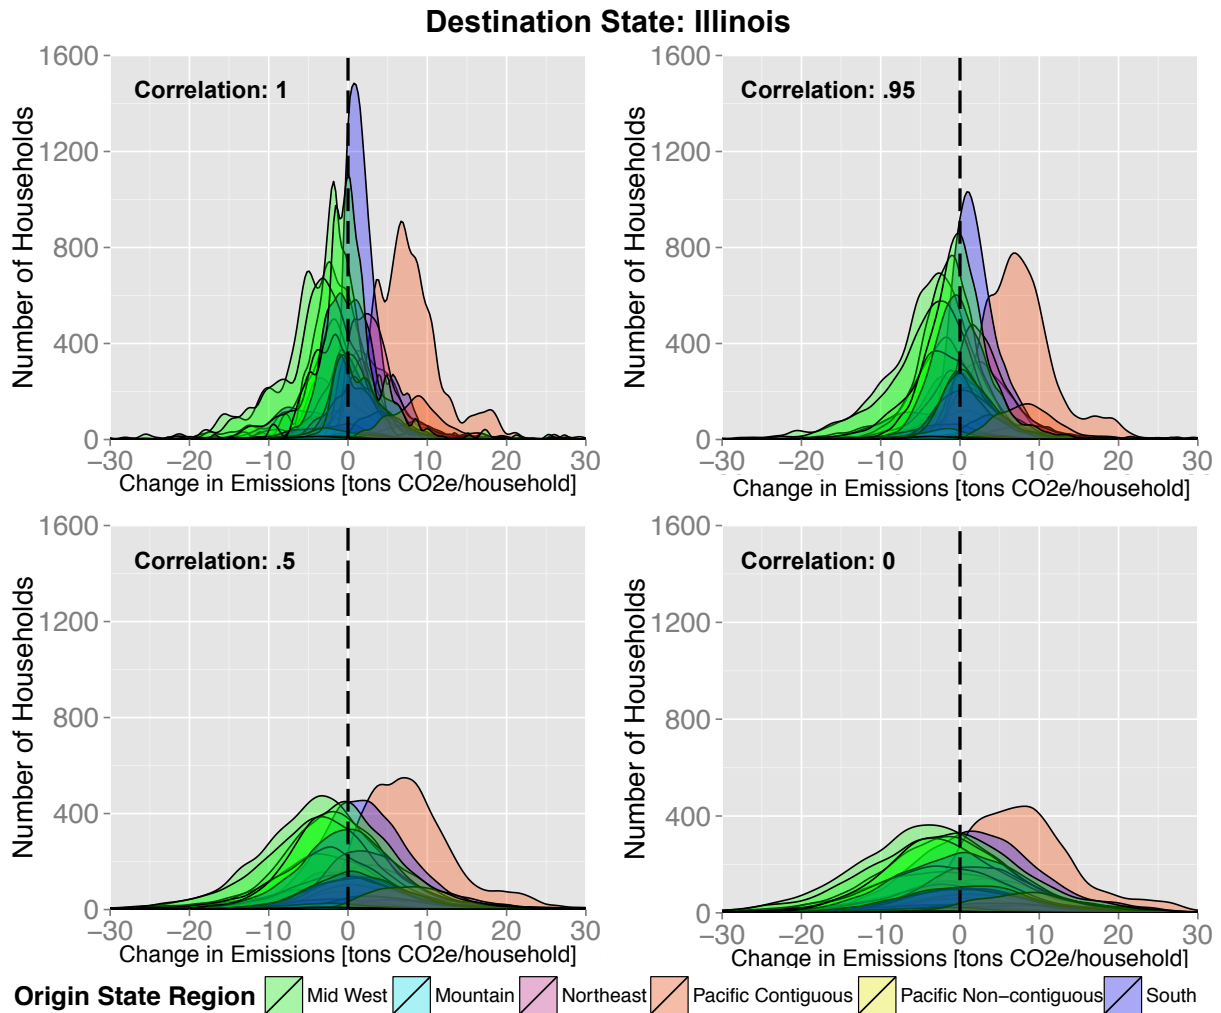

**Figure 9** Distributions of expected household emission changes for households moving to Illinois by origin state using different correlation values to describe the relationship between a household's origin and destination state energy use percentile. The figures show correlation of generated random normal variables before transforming them to random uniform variables, which estimate percentile of energy use. The resulting correlation of a household's energy use in origin and destination state is shown in Table 9.

This paper shows results using a correlation of 0.95 for randomly generated normal variables, which results in a correlation of 0.83 for total energy use of household in origin and destination states. Figure 9 shows the distributions of household emission changes for households moving to Illinois by origin state using different correlation coefficients. US aggregate and state emission sums remain similar when using different correlation coefficients.

## References:

- (1) US Energy Information Administration. Voluntary Reporting of Greenhouse Gases Program <http://www.eia.gov/oiaf/1605/ee-factors.html> (accessed Jun 2013).
- (2) Advanced Resource International Inc; IFC International. GREENHOUSE GASLIFE-CYCLE EMISSIONS STUDY: Fuel Life-Cycle of U.S. Natural Gas Supplies and International LNG; 2008; pp. 1–68.
- (3) Venkatesh, A.; Jaramillo, P.; Griffin, W. M.; Matthews, H. S. Uncertainty in Life Cycle Greenhouse Gas Emissions from United States Natural Gas End-Uses and its Effects on Policy. *Environ. Sci. Technol.* **2011**, *45*, 8182–8189.
- (4) National Renewable Energy Laboratory,. US Life Cycle Inventory Database <https://www.lcacommons.gov/nrel/search> (accessed 2013).
- (5) Siler-Evans, K.; Azevedo, I. L.; Morgan, M. G. Marginal Emissions Factors for the U.S. Electricity System. *Environ. Sci. Technol.* **2012**, *46*, 4742–4748.
- (6) Hawkes, A. D. Energy Policy. *Energy Policy* **2010**, *38*, 5977–5987.
- (7) Doucette, R. T.; McCulloch, M. D. Energy Policy. *Energy Policy* **2011**, *39*, 803–811.
- (8) Bettle, R.; Pout, C. H.; Hitchin, E. R. Interactions between electricity-saving measures and carbon emissions from power generation in England and Wales. *Energy Policy* **2006**, *34*, 3434–3446.
- (9) USDA Economic Research Service. Population & Migration Overview <http://www.ers.usda.gov/topics/rural-economy-population/population-migration.aspx#.UzIs317TaiQ> (accessed Mar 26, 2014).
- (10) 2007- 2011 ACS County-to-County Migration Files Documentation; US Census Bureau.
- (11) Weinberger, R.; Goetzke, F. Unpacking Preference: How Previous Experience Affects Auto Ownership in the United States. *Urban Studies* **2010**, *47*, 2111–2128.
